# Supplementary material for: Identification of biomarkers associated with clinical severity of chronic obstructive pulmonary disease
Source: PeerJ. 2020 Dec 10;8:e10513. doi: 10.7717/peerj.10513 (PMC7733647; doi:10.7717/peerj.10513)
Supplement: Supplemental Information 1 [file peerj-08-10513-s001.xlsx]

## Sheet: IL-6
non-smoker	smoker	Grade I-II	Grade III-IV
3.5	3.8	18.26	17.06
3.86	24.53	31.64	52.68
2.98	10.63	5.45	54.72
4.55	24.1	29.48	30.97
4.98	7.67	9.74	57.72
9.85	21.33	25.32	65.46
12.52	4.98	2.08	75.65
11.52	31.49	3.39	53.72
16.35	2.09	30.13	22.44
5.98	9.65	24.26	17.45
2.85	6.62	29.7	30.85
6.38	24.5	4.73	76.85
10.88	27.16	15.46	60.59
10.46	6.79	2.1	59.88
9.85	7.25	9.16	27.85
8.67	12.05	14.37	59.44
8.84	23.39	21.72	47.84
9.33	15.8	25.24	34.63
11.05	19.85	22.3	42.6
10.58	11.3	11.85	58.24
13.52	33.34	26.71	46.19
13.05	32.34	18.9	54.63
14.05	26.95	20.49	73.29
6.85	16.46	26.22
6.87	26.1	32.7
3.15	3.94	31.25
5.56	29.76	2.58
1.33	7.28	22.47
9.45	11.1	10.95
8.85	10.85	29.36
4.85	27.68
6.26	9.51
8.82	27.7
	23.79
	26.77
	10.51
	10.27
	16.64
	19.91
	19.54
	28.87
	26.87

## Sheet: IL-8
non-smoker	smoker	Grade I-II	Grade III-IV
6.6	13.53	23.23	90.47
5.81	33.43	34.34	117.45
2.13	31.95	53.98	79.41
9.79	36.2	51.42	189.63
8.74	21.79	39.7	155.82
11.05	17.24	36.51	199.93
15.36	26.56	36.21	180.22
8.2	41.97	15.72	139.35
3.45	34.32	22.87	147.19
4.21	29.82	23.24	213.75
16.78	12.17	23.55	139.14
11.67	29.92	53.89	122.03
18.18	18.18	51.31	85.53
13.89	37.11	31.67	51.35
18.08	41.05	51.31	199.93
11.96	24.47	19.69	119.34
3.8	40.36	40.41	82.5
4.12	14.58	24.17	146
16.76	18.75	54.96	213.23
6.38	33.88	23.71	231.69
15.6	36.14	15.87	129.48
18.72	32.29	32.47	163.14
6.86	19.75	23.96	118.4
16.75	36.2	50.67
6.87	26.77	18.54
3.59	16.54	28.19
3.58	18.48	17.44
11.32	40.72	49.03
6.82	37.09	54.87
5.76	28.44	48.88
17.88	20.88
17.82	30.63
5.12	34.9
	10.19
	8.05
	31.69
	33.94
	25.16
	34.32
	41.25
	11.33
	22.32

## Sheet: TNF-alpha
non-smoker	smoker	Grade I-II	Grade III-IV
8.88	31.96	40.92	80.84
1.78	31.89	49.19	59.62
11	36.09	50.67	239.23
5.48	17.02	47.08	222.4
12.09	27.84	32.38	177.73
8.27	14.8	53.28	108.69
15.95	24.36	42.02	198.89
14.48	12.93	38.39	101.64
13.51	14.69	46.17	55.1
8.45	13.97	36.73	82.49
15.12	26.82	45.82	146.1
11.35	25.84	35.32	130.43
8.92	14.96	15.47	157.82
2.86	10.14	16.66	68.94
5.13	17.84	19.55	135.79
3.93	30.33	18.29	147.24
11.34	42.42	32.38	66.94
12.41	10.91	31.34	54.83
15.22	30.16	41.58	177.98
12.84	32.87	25.77	210.69
11.46	9.59	36.41	63.03
8.03	30.26	35.67	205.72
10.15	33.67	35.29	60.52
5.96	12.8	54.02
11.18	35.06	18.84
17.25	11.34	37.58
3.01	21.66	22.11
8.54	33.89	34.62
6.65	18.59	45.84
5.76	11.49	16.91
8.39	15.76
2.97	18.71
14.08	34.4
	29.38
	29.72
	11.94
	39.8
	15.72
	15.65
	40.99
	23.08
	37.12

## Sheet: IFN-gama
non-smoker	smoker	Grade I-II	Grade III-IV
7.89	48.26	87.82	167.64
4.47	39.99	32.91	89.09
19.21	32.63	20.17	166.37
8.84	8.68	45.33	153.35
9.7	30.5	39.05	40.54
12.15	8.28	39.04	140.85
1.47	34.97	48.23	140.48
6.59	11.28	33.96	156.78
19.23	21.85	26.81	126.41
5.82	41.27	26.26	44.73
4.52	41.44	36.91	162.31
15.33	34.24	54.71	134.02
12.34	10.48	33.21	212.35
16.76	29.38	22.03	51.4
9.7	20.69	24.96	121.98
17.66	14.7	20.07	156.53
4.31	27.04	52.08	219.37
4.44	27.34	30.71	229.87
9.22	25.28	52.91	229.64
5.52	13.05	41.85	108.91
15.59	28.64	27.09	124.45
0.92	20.9	40.7	129.75
0.02	14.64	43.15	98.22
13.97	14.34	43.78
11.39	36.55	19.43
19.8	41.37	41.27
5.36	27.83	17.34
2.74	34.06	20.38
8.62	9	50.59
3.41	26.75	38.57
18.51	33.69
13.89	16.05
10.22	32.3
28.69	28.69
	29.77
	20.75
	35.82
	42.97
	13.03
	19.23
	41.05
	8.45

## Sheet: TLR2
non-smoker	smoker	Grade I-II	Grade III-IV
1.052	1.568	2.235	3.258
1.325	1.886	2.012	0.857
0.625	1.785	1.005	0.769
0.385	0.859	1.023	3.52
0.425	0.698	1.045	3.058
1.385	1.698	1.125	5.85
1.056	2.235	1.305	6.256
1.145	3.015	1.338	5.398
2.046	3.245	2.568	7.46
0.856	3.345	0.985	5.514
1.335	1.056	0.857	5.304
2.354	1.228	0.788	5.862
1.052	0.929	3.989	4.315
0.985	0.678	4.012	4.024
0.995	1.853	3.252	4.167
1.304	0.456	3.332	3.258
1.458	0.987	2.315	2.228
1.605	3.056	1.985	5.168
1.701	4.025	3.012	5.895
1.332	1.985	2.352	6.152
1.205	3.025	3.257	1.625
1.389	1.9125	2.685	2.852
1.578	0.928	2.458	3.825
0.523	1.126	3.465
2.623	2.589	3.338
3.025	2.369	2.254
2.125	2.563	3.052
1.334	2.985	1.562
1.025	2.3054	2.65
1.342	2.665	2.015
1.336	2.7857
1.896	3.345
0.758	3.378
	4.925
	2.598
	2.48
	2.698
	2.762
	2.825
	4.854
	4.326
	3.125
